# Supplementary material
Source: PubMed Central journal article supplement (PMC7011704)
Supplement: mt9b00489_si_001.pdf [file mt9b00489_si_001.pdf]

## Supporting Information

### Self-assembly of a Catalytically Active Lipopeptide and its Incorporation into Cubosomes

Valeria Castelletto, Charlotte J. C. Edwards-Gayle and Ian W. Hamley\*

*Dept. of Chemistry, University of Reading, Reading RG6 6AD, United Kingdom*

Juliane N. B. D. Pelin and Wendel A. Alves

*Centro de Ciências Naturais e Humanas, Federal do ABC, Santo André 09210-580, Brazil*

Andrea M. Aguilar

*Instituto de Ciências Ambientais, Químicas e Farmacêuticas, Universidade Federal de São Paulo, Diadema, 09972-270, Brazil*

Jani Seitsonen and Janne Ruokolainen,

*Nanomicroscopy Center, Aalto University, Puumiehenkuja 2, FIN-02150 Espoo, Finland.*

\* Author for Correspondence: I.W.Hamley@reading.ac.uk

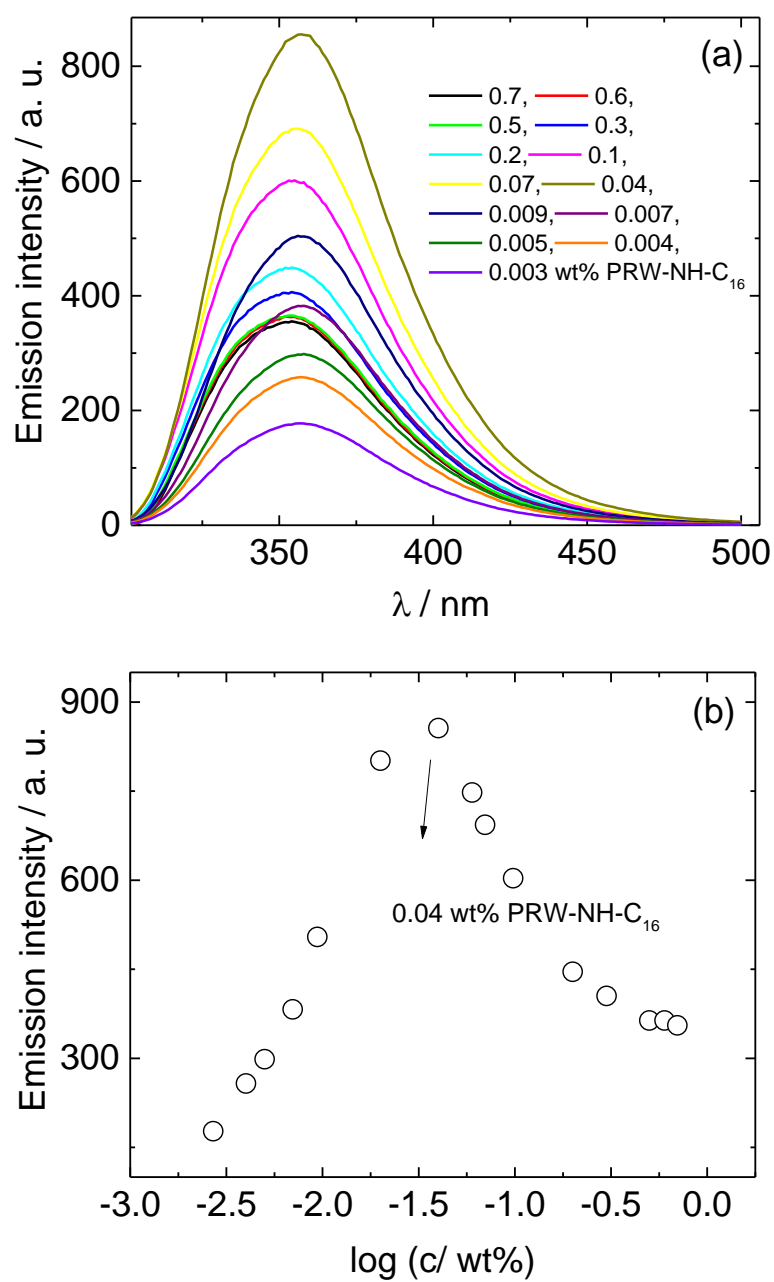

**Figure S1.** (a) Tryptophan fluorescence for PRW-NH-C<sub>16</sub>, (b) dependence of the maxima in the fluorescence intensity in (a) with concentration.

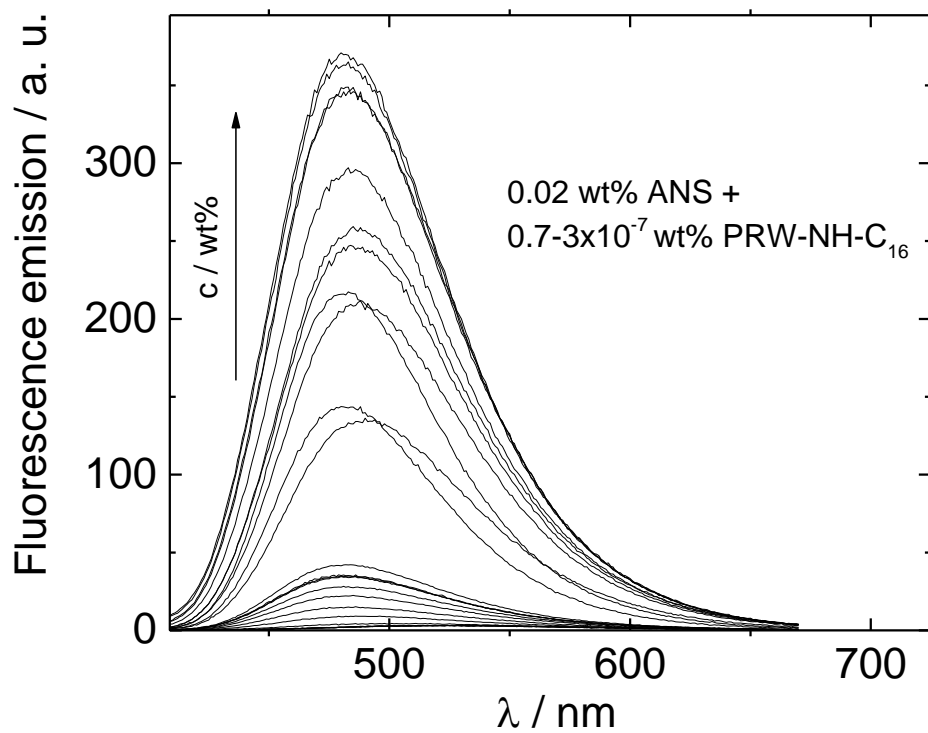

**Figure S2.** ANS fluorescence spectra for PRW-NH-C<sub>16</sub>.

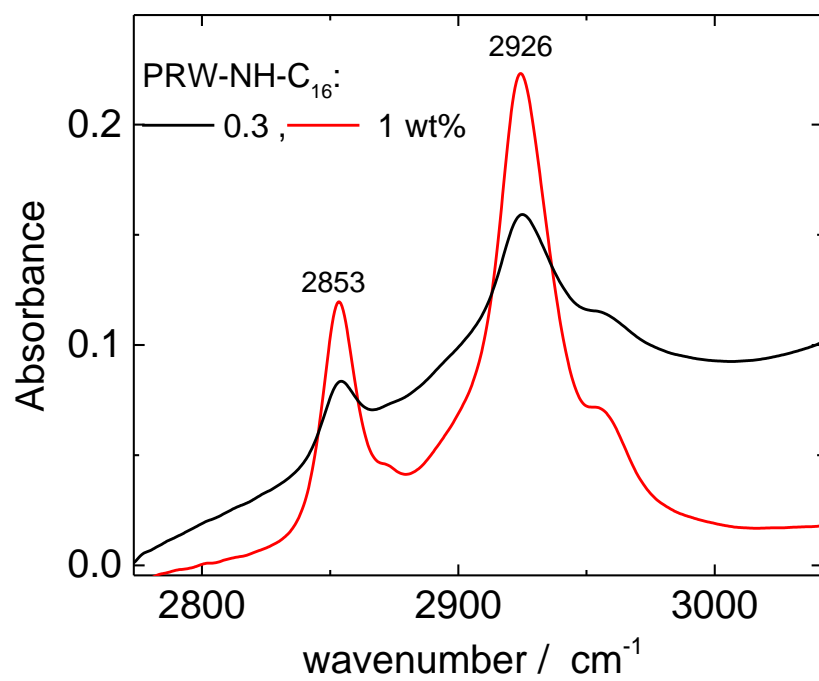

**Figure S3.** FTIR spectra in the region of CH<sub>2</sub> stretch modes.

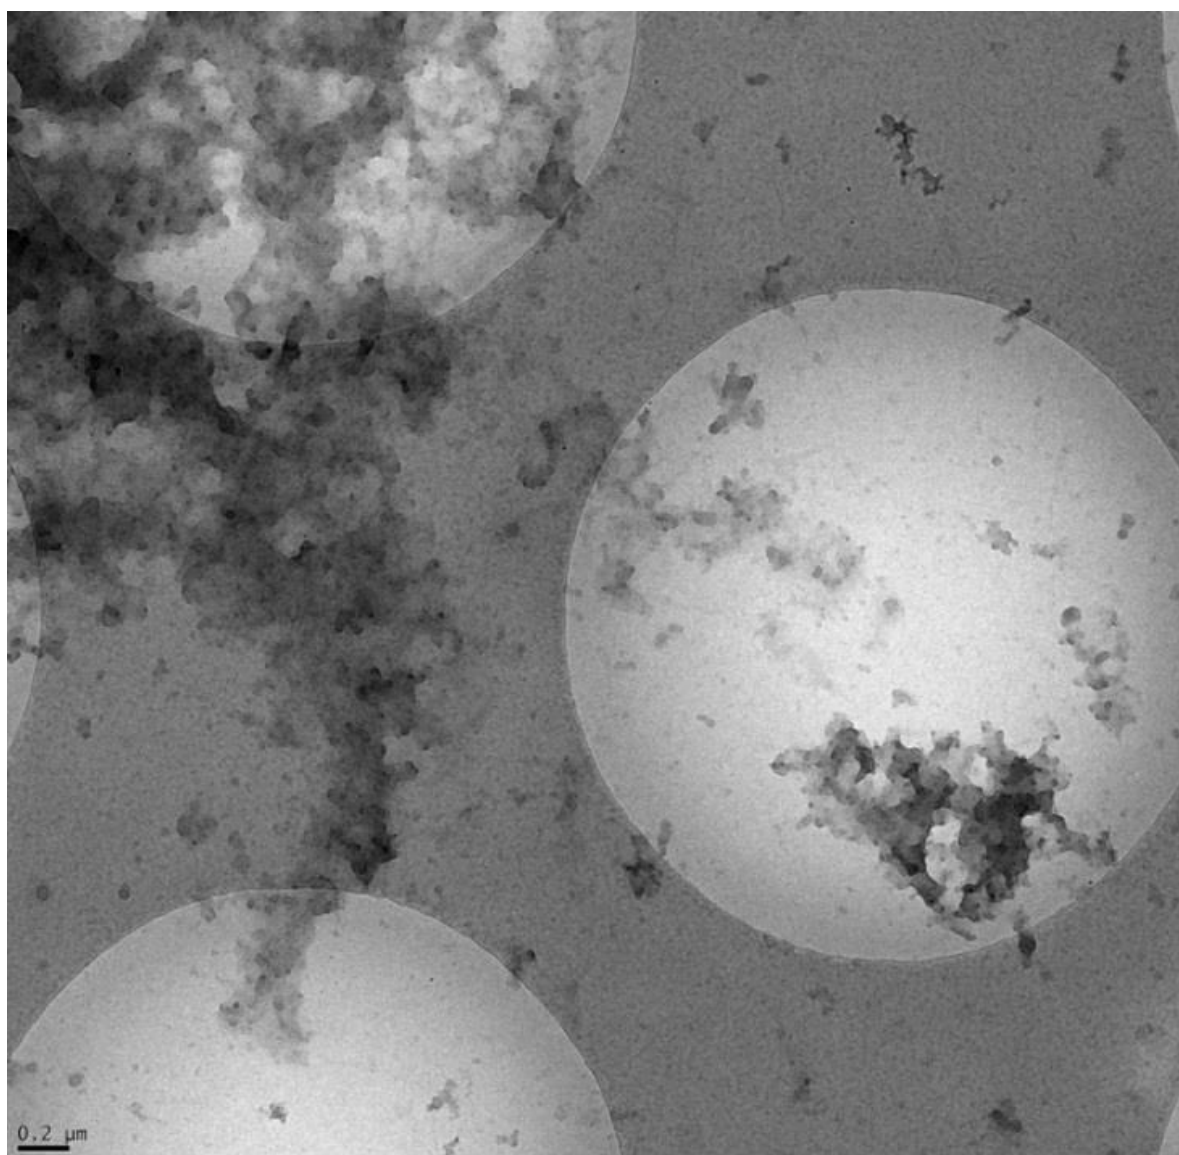

**Figure S4.** Additional cryo-TEM image from a 1 wt% solution of PRW-NH-C<sub>16</sub>.

**(S)-2-((R)-Hydroxy(4-nitrophenyl)methyl)cyclohexan-1-one**

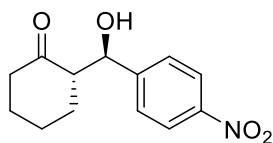

**(a)**

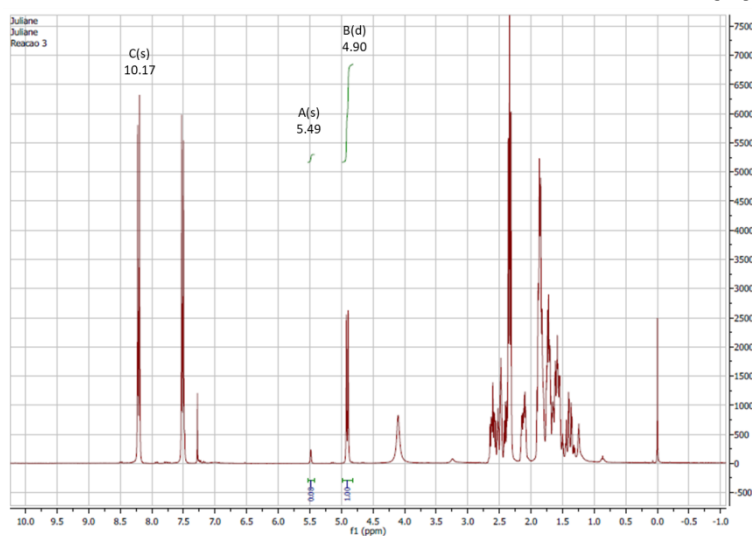

**(b)**

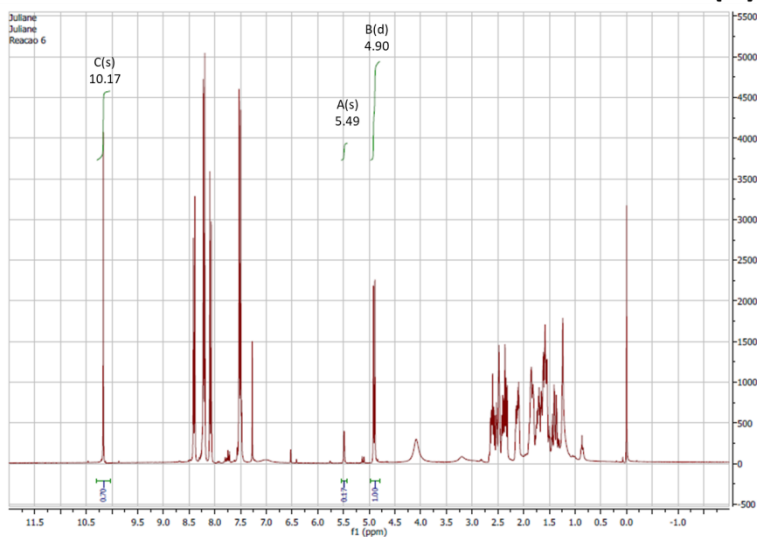

**Figure S5.**  $^1\text{H}$  NMR spectra of crude aldol product for Entries (a) 1 and (b) 4.

$^1\text{H}$  NMR (300 MHz,  $\text{CDCl}_3$ ):  $\delta$  8.22-8.18 (m, 2H, ArH), 7.51-7.47 (m, 2H, ArH), 5.49 (br s, 1H, *CHOH* of *syn* diastereoisomer), 4.90 (d,  $J = 7.5$  Hz, 1H, *CHOH* of *anti* diastereoisomer), 2.66-2.30 (m, 1H, *CHCHOH*), 2.66-2.30 (m, 2H,  $\text{CH}_2\text{C}(\text{O})$ ), 2.16-1.24 (m, 6H, cHex-H).

$^{13}\text{C}$  NMR (75 MHz,  $\text{CDCl}_3$ ):  $\delta$  214.9, 148.5, 147.7, 128.0, 123.7, 74.1, 57.3, 42.8, 30.9, 27.8, 24.8.

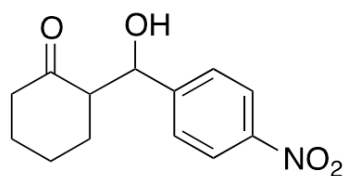

*racemic*

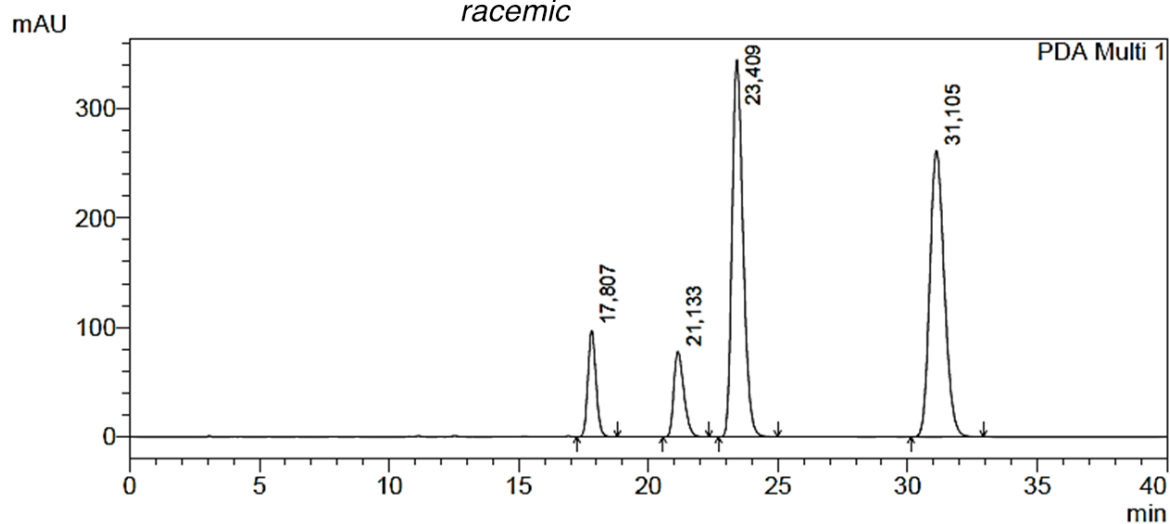

1 PDA Multi 1/254nm,4nm

PeakTable

| Peak# | Ret. Time | Area     | Height | Area %  | Height % |
|-------|-----------|----------|--------|---------|----------|
| 1     | 17,807    | 2098997  | 96930  | 8,560   | 12,422   |
| 2     | 21,133    | 2101762  | 77810  | 8,571   | 9,972    |
| 3     | 23,409    | 10148757 | 344448 | 41,387  | 44,144   |
| 4     | 31,105    | 10172017 | 261098 | 41,482  | 33,462   |
| Total |           | 24521532 | 780286 | 100,000 | 100,000  |

**Figure S6.** HPLC chromatogram for racemic aldol product. Conditions: Chiralpak AD-H, hexane/2-propanol (90/10); 1.0 mL·min<sup>-1</sup>,  $\lambda$ = 254 nm.

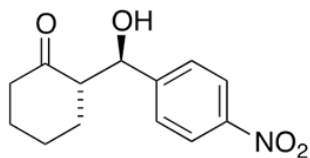

(a)

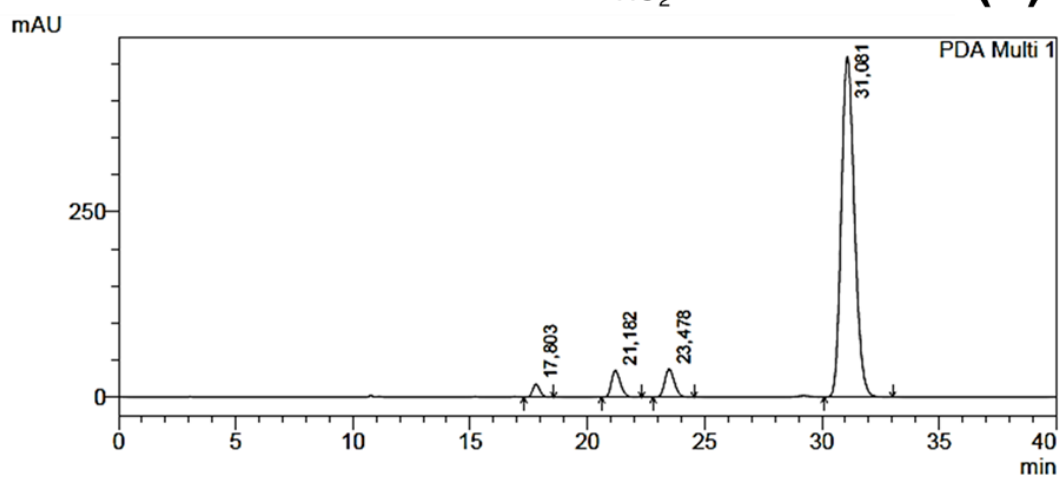

1 PDA Multi 1/254nm,4nm

PeakTable

| PDA Ch1 254nm |           |          |        |         |          |
|---------------|-----------|----------|--------|---------|----------|
| Peak#         | Ret. Time | Area     | Height | Area %  | Height % |
| 1             | 17,803    | 382644   | 17761  | 1,882   | 3,228    |
| 2             | 21,182    | 966113   | 35992  | 4,752   | 6,542    |
| 3             | 23,478    | 1094478  | 37766  | 5,384   | 6,865    |
| 4             | 31,081    | 17886323 | 458635 | 87,982  | 83,365   |
| Total         |           | 20329558 | 550153 | 100,000 | 100,000  |



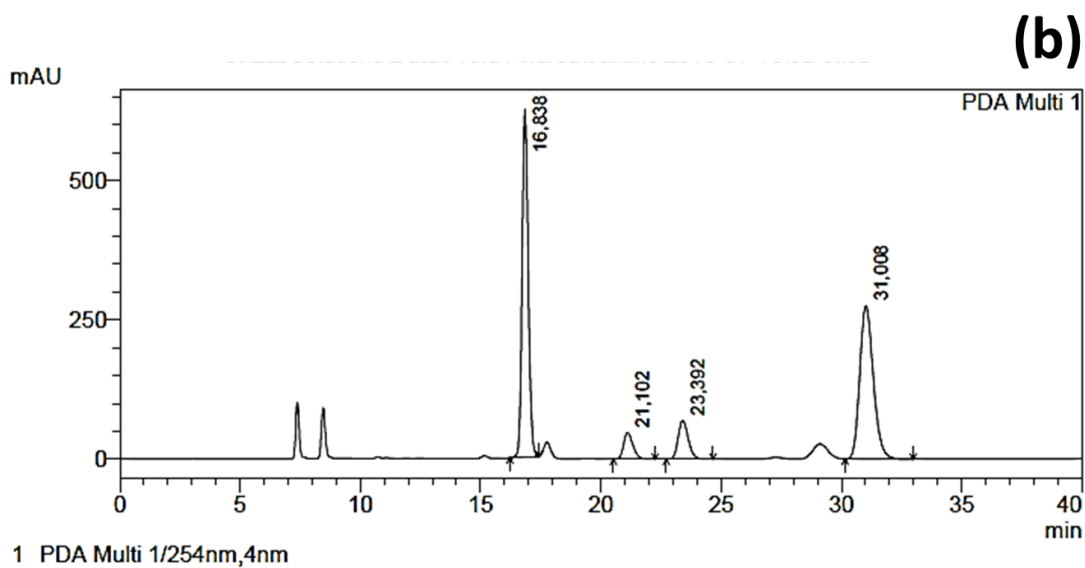

PeakTable

| PDA Ch1 254nm |           |          |         |         |          |
|---------------|-----------|----------|---------|---------|----------|
| Peak#         | Ret. Time | Area     | Height  | Area %  | Height % |
| 1             | 16.838    | 10943283 | 624097  | 43.746  | 61.455   |
| 2             | 21.102    | 1278264  | 47562   | 5.110   | 4.683    |
| 3             | 23.392    | 2024442  | 69619   | 8.093   | 6.855    |
| 4             | 31.008    | 10769242 | 274250  | 43.051  | 27.006   |
| Total         |           | 25015231 | 1015528 | 100.000 | 100.000  |

**Figure S7.** Representative HPLC chromatograms for racemic aldol product and chiral aldol product for entries (a) 1 and (b) 4. Conditions: Chiralpak AD-H, hexane/2-propanol (90/10); 1.0 mL·min<sup>-1</sup>,  $\lambda = 254$  nm. The *anti*:*syn* ratio is obtained from the relative areas of peaks 4 and 3:  $[A(\text{peak 4}) - A(\text{peak 3})]/[A(\text{peak 4}) + A(\text{peak 3})]$ .

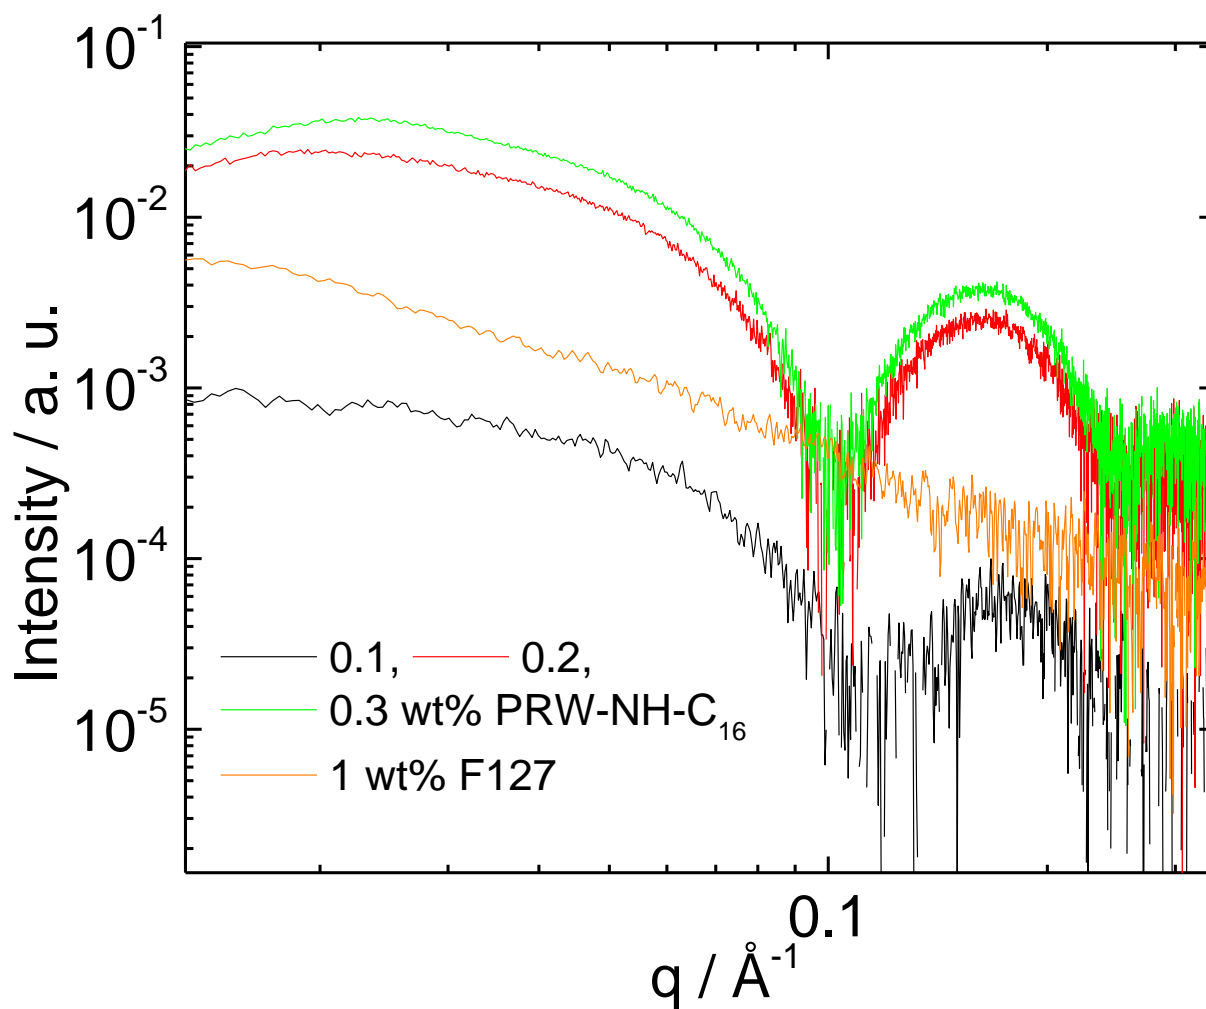

**Figure S8.** Controls (peptide or F127 only) for the SAXS data in Fig. 3.

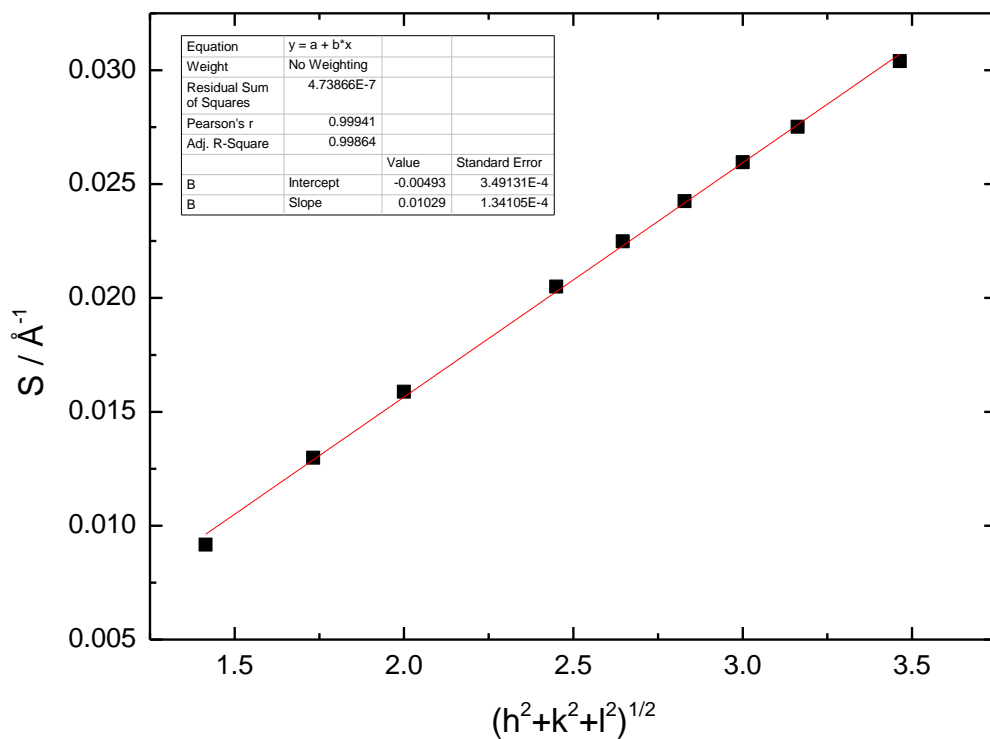

**Figure S9.** Indexation of SAXS reflections observed for the cubosomes (in the absence of lipopeptide) from the SAXS profile shown in Fig.3a. The lattice constant  $a$  is determined as the reciprocal of the gradient.

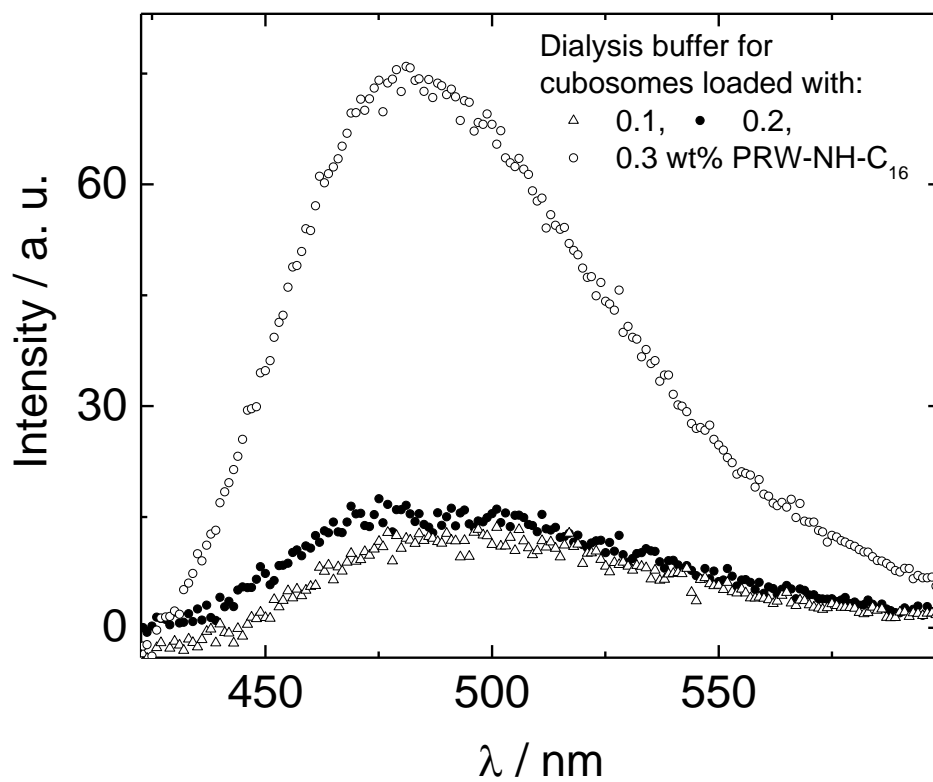

**Figure S10.** FLC assay on the dialysis buffer of cubosomes made of 10 wt% monoolein+1 wt% F127 and loaded with 0.1, 0.2 or 0.3 wt% PRW-NH-C<sub>16</sub>.
